# Supplementary material for: Persistent symptoms after COVID-19 are not associated with differential SARS-CoV-2 antibody or T cell immunity
Source: PubMed Central journal article supplement (PMC10447583; doi:10.1038/s41467-023-40460-1), 2023-08-23
Supplement: 41467_2023_40460_MOESM1_ESM.pdf [file 41467_2023_40460_MOESM1_ESM.pdf]

## Supplementary Information

Persistent symptoms after COVID-19 are not associated  
with differential SARS-CoV-2 antibody or T cell immunity

Daniel M. Altmann<sup>1\*</sup>, Catherine J Reynolds<sup>2</sup>, George Joy<sup>3,4</sup>, Ashley D. Otter<sup>5</sup>, Joseph M. Gibbons<sup>6</sup>, Corinna Pade<sup>6</sup>, Leo Swadling<sup>7</sup>, Mala K. Maini<sup>7</sup>, Tim Brooks<sup>5</sup>, Amanda Semper<sup>5</sup>, Áine McKnight<sup>6</sup>, Mahdad Noursadeghi<sup>7</sup>, Charlotte Manisty<sup>3,4</sup>, Thomas A Treibel<sup>3,4</sup>, James C Moon<sup>3,4</sup>, COVIDsortium investigators<sup>§</sup>, Rosemary J Boyton<sup>2,8\*</sup>

<sup>1</sup>Department of Immunology and Inflammation, Imperial College London, London, UK

<sup>2</sup>Department of Infectious Disease, Imperial College London, London, UK

<sup>3</sup>St Bartholomew's Hospital, Barts Health NHS Trust, London, UK

<sup>4</sup>Institute of Cardiovascular Science, University College London, UK

<sup>5</sup>UK Health Security Agency, Porton Down, UK

<sup>6</sup>Blizard Institute, Barts and the London School of Medicine and Dentistry, Queen Mary University of London, London, UK

<sup>7</sup>Division of Infection and Immunity, University College London, London, UK

<sup>8</sup>Lung Division, Royal Brompton and Harefield Hospitals, Guy's and St Thomas' NHS Foundation Trust, London, UK

\*Corresponding authors

Prof. Rosemary Boyton, PhD, FRCP, FHEA

Prof. Daniel Altmann, PhD

Faculty of Medicine, Hammersmith Hospital Campus

Imperial College London, Du Cane Road, London W12 0NN, UK.

Email: [r.boyton@imperial.ac.uk](mailto:r.boyton@imperial.ac.uk); [d.altmann@imperial.ac.uk](mailto:d.altmann@imperial.ac.uk)

**Supplementary Figure 1.** Longitudinal S1 RBD antibody titers (black circle) and T cell responses against spike megapool (purple circle). Longitudinal data is shown from the date of SARS-CoV2 PCR positive confirmed infection and over the following 15 week follow up for individual HCW. Source data are provided as a Source Data file. **(A)** HCW that had Recovered 12 months after infection (closed circle) and **(B)** HCW reporting Persistent symptoms at 12 months (open circle). Ab, antibody; HCW, health care worker; PBMC, peripheral blood mononuclear cells; RBD, receptor binding domain; SFC, spot forming cells; U, units.

**A**

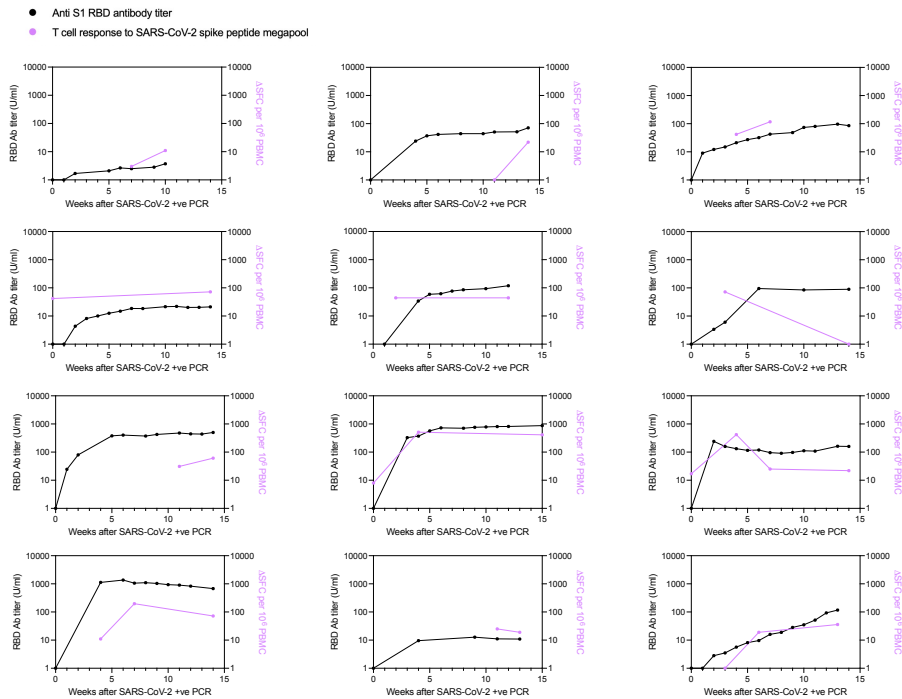

**B**

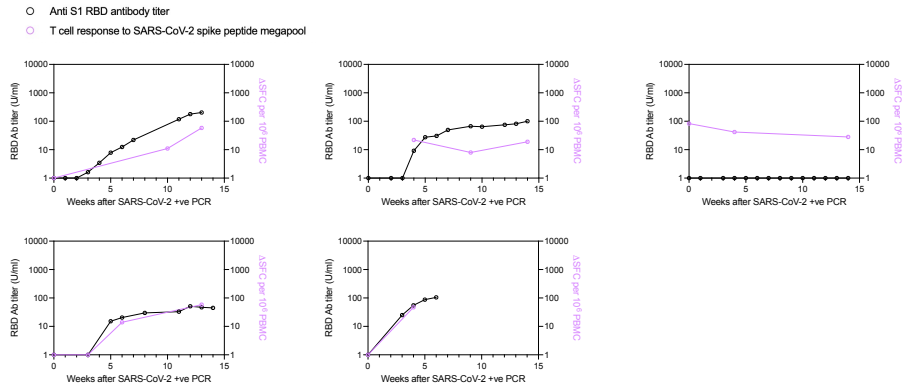

**Supplementary Figure 2.** Longitudinal (A) S1 RBD and (B) nucleocapsid antibody titers measured in the whole HCW cohort (n=86, 33% male: Recovered, closed circle, n = 61, 34% male; Persistent symptoms, open circle, n = 25, 28% male) are annotated to indicate HCW (Recovered, orange closed circle, n = 15, 57% male; Persistent symptoms, orange open circle, n = 7, 57% male) that were included in the neutralizing antibody and T cell assays at 12-month follow-up. Source data are provided as a Source Data file. Two-tailed Mann-Whitney U tests (Graphpad Prism version 8.0) were used to test for significant differences between recovered HCW and those reporting persistent symptoms. Error bars shown are geometric mean  $\pm$  1 geometric SD. Ab, antibody; COI, cut-off index; HCW, health care worker; N, nucleocapsid; RBD, receptor binding domain; SD, standard deviation; U, units.

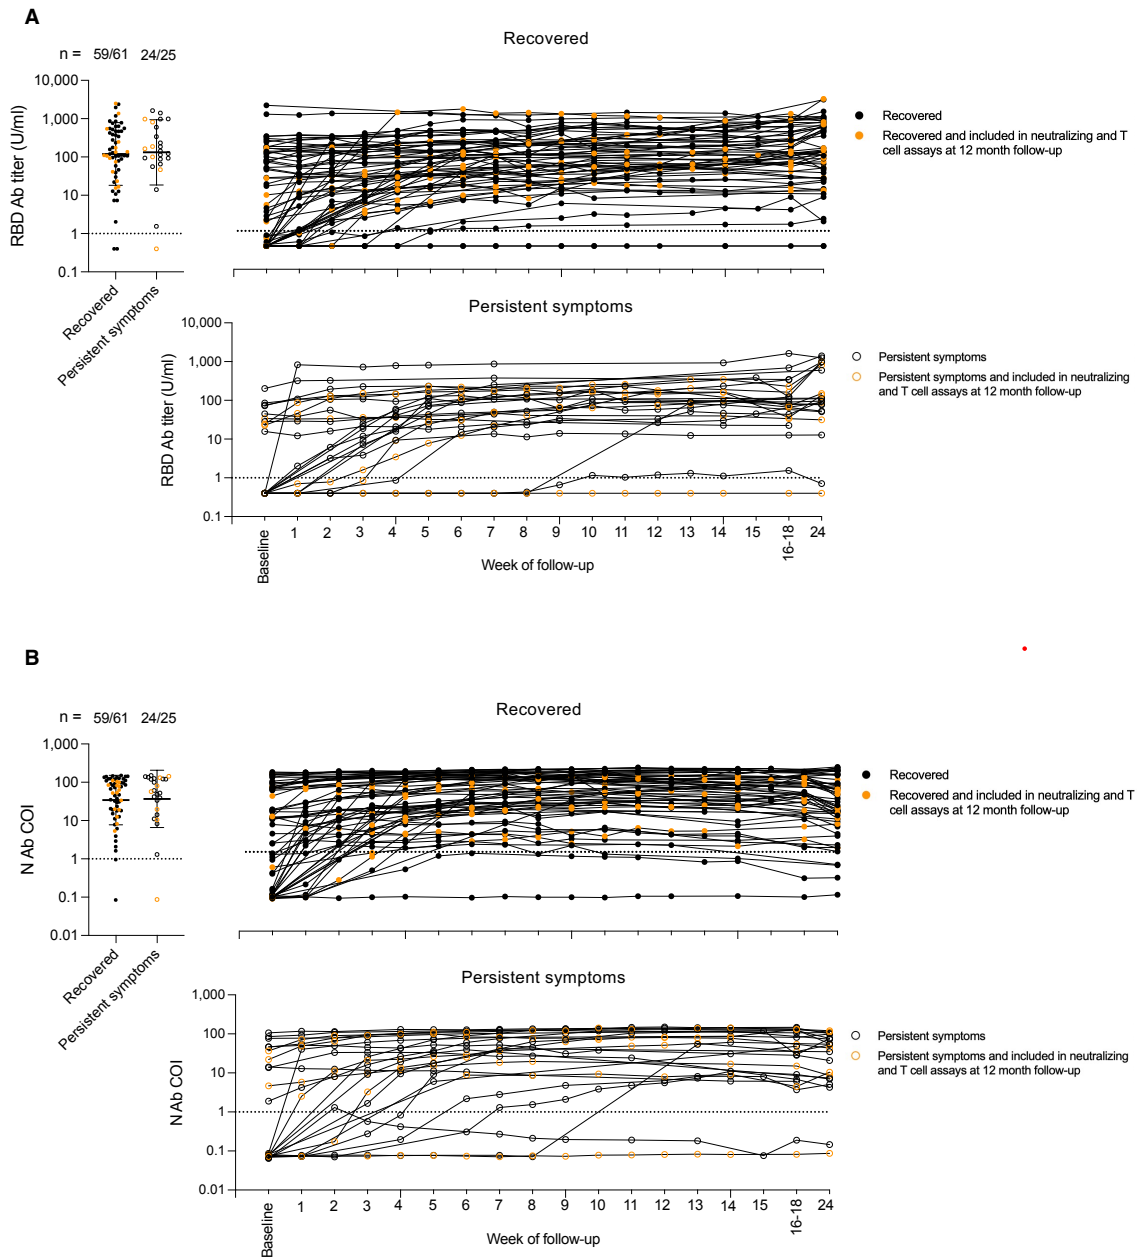

**Supplementary Figure 3.** CONSORT diagram for Persistent symptom and Recovered sub-study recruitment including assays performed at each timepoint

**COVIDsortium cohort recruited HCW from St Bartholomew’s, Nightingale and Royal Free Hospital NHS Hospitals, London between 23<sup>rd</sup> March and 7<sup>th</sup> May 2020**

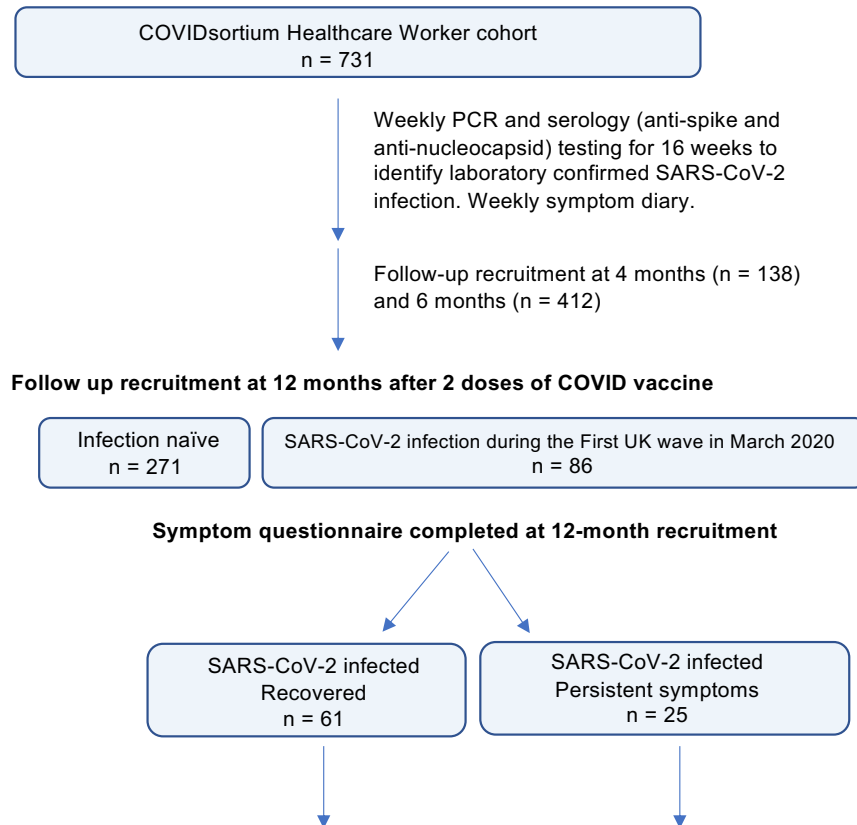

**Baseline to 4 months**

Data analysis

|                                     | n = | n = |
|-------------------------------------|-----|-----|
| S1 RBD serology                     | 61  | 25  |
| Nucleocapsid serology               | 61  | 25  |
| Pseudovirus neutralization          | 37  | 21  |
| Protein and MEP pool T cell ELISpot | 37  | 21  |
| FEC peptide ELISpot                 | 34  | 19  |
| Peptide megapool T cell ELISpot     | 14  | 8   |

**12 months**

Data analysis

|                           | n = | n = |
|---------------------------|-----|-----|
| S1 RBD serology           | 53  | 25  |
| Nucleocapsid serology     | 61  | 25  |
| Live virus neutralization | 14  | 7   |
| MEP pool T cell ELISpot   | 14  | 7   |

## COVIDsortium Investigators:

Hakam Abbass<sup>3</sup>, Aderonke Abiodun<sup>3,4</sup>, Mashael Alfarih<sup>3</sup>, Zoe Alldis<sup>3</sup>, Daniel M Altmann<sup>1</sup>, Oliver E Amin<sup>7</sup>, Mervyn Andiapen<sup>3</sup>, Jessica Artico<sup>3</sup>, João B Augusto<sup>3</sup>, Georgina L Baca<sup>3</sup>, Sasha N L Bailey<sup>2</sup>, Anish N Bhuvu<sup>3</sup>, Alex Boulter<sup>3</sup>, Ruth Bowles<sup>3</sup>, Rosemary J Boyton<sup>2,8</sup>, Olivia V Bracken<sup>9</sup>, Ben O'Brien<sup>3,10</sup>, Tim Brooks<sup>5</sup>, Natalie Bullock<sup>6</sup>, David K Butler<sup>2</sup>, Gabriella Captur<sup>4,11</sup>, Olivia Carr<sup>5</sup>, Benjamin M Chain<sup>7</sup>, Nicola Champion<sup>3</sup>, Carmen Chan<sup>3</sup>, Aneesh Chandran<sup>7</sup>, David Collier<sup>20</sup>, Tom Coleman<sup>5</sup>, Jorge Couto de Sousa<sup>3</sup>, Xose Couto-Parada<sup>3</sup>, Eleanor Cross<sup>5</sup>, Teresa Cutino-Moguel<sup>3</sup>, Silvia D'Arcangelo<sup>5</sup>, Rhodri H Davies<sup>3</sup>, Brooke Douglas<sup>11</sup>, Cecilia Di Genova<sup>14</sup>, Keenan Dieobi-Anene<sup>3</sup>, Mariana O Diniz<sup>7</sup>, Anaya Ellis<sup>5</sup>, Karen Feehan<sup>9</sup>, Malcolm Finlay<sup>3</sup>, Marianna Fontana<sup>11</sup>, Nasim Forooghi<sup>3</sup>, Sasha Francis<sup>5</sup>, Celia Gaier<sup>9</sup>, Joseph M Gibbons<sup>6</sup>, David Gillespie<sup>3</sup>, Derek Gilroy<sup>15</sup>, Matt Hamblin<sup>3</sup>, Gabrielle Harker<sup>5</sup>, Georgia Hemingway<sup>5</sup>, Jacqueline Hewson<sup>5</sup>, Wendy Heywood<sup>16,17</sup>, Lauren M Hickling<sup>18</sup>, Bethany Hicks<sup>5</sup>, Aroon D Hingorani<sup>7</sup>, Lee Howes<sup>4</sup>, Alun Hughes<sup>4</sup>, Gemma Hughes<sup>3</sup>, Rebecca Hughes<sup>3,4</sup>, Ivie Itua<sup>3</sup>, Victor Jardim<sup>3</sup>, Wing-Yiu Jason Lee<sup>6</sup>, Melanie Petra Jensen<sup>3</sup>, Jessica Jones<sup>5</sup>, Meleri Jones<sup>6</sup>, George Joy<sup>3,4</sup>, Vikas Kapil<sup>3,20</sup>, Caoimhe Kelly<sup>5</sup>, Hibba Kurdi<sup>3,4</sup>, Jonathan Lambourne<sup>3</sup>, Kai-Min Lin<sup>2</sup>, Siyi Liu<sup>2</sup>, Aaron Lloyd<sup>5</sup>, Sarah Louth<sup>11</sup>, Mala K Maini<sup>7</sup>, Vineela Mandadapu<sup>3</sup>, Charlotte Manisty<sup>3,4</sup>, Áine McKnight<sup>6</sup>, Katia Menacho<sup>3</sup>, Celina Mfuko<sup>3</sup>, Kevin Mills<sup>16,17</sup>, Sebastian Millward<sup>5</sup>, Oliver Mitchelmore<sup>3</sup>, Christopher Moon<sup>5</sup>, James C Moon<sup>3,4</sup>, Diana Muñoz Sandoval<sup>2</sup>, Sam M Murray<sup>2</sup>, Mahdad Noursadeghi<sup>7</sup>, Ashley Otter<sup>5</sup>, Corinna Pade<sup>6</sup>, Susana Palma<sup>3</sup>, Ruth Parker<sup>19</sup>, Kush Patel<sup>3</sup>, Mihaela Pawarova<sup>11</sup>, Steffen E Petersen<sup>3</sup>, Brian Piniera<sup>3</sup>, Franziska P Pieper<sup>2</sup>, Daniel Pope<sup>3,20</sup>, Mary Prossora<sup>3</sup>, Lisa Rannigan<sup>11</sup>, Alicja Rapala<sup>4</sup>, Catherine J Reynolds<sup>2</sup>, Amy Richards<sup>3</sup>, Matthew Robathan<sup>20</sup>, Joshua Rosenheim<sup>7</sup>, Cathy Rowe<sup>5</sup>, Matthew Royds<sup>5</sup>, Jane Sackville West<sup>21</sup>, Genine Sambile<sup>3</sup>, Nathalie M. Schmidt<sup>7</sup>, Hannah Selman<sup>5</sup>, Amanda Semper<sup>5</sup>, Andreas Seraphim<sup>3</sup>, Mihaela Simion<sup>11</sup>, Angelique Smit<sup>11</sup>, Michelle Sugimoto<sup>9</sup>, Leo Swadling<sup>7</sup>, Stephen Taylor<sup>5</sup>, Nigel Temperton<sup>14</sup>, Stephen Thomas<sup>5</sup>, George D Thornton<sup>3,4</sup>, Thomas A Treibel<sup>3,4</sup>, Art Tucker<sup>3</sup>, Ana M Valdes<sup>22,23</sup>, Ann Varghese<sup>5</sup>, Jessry Veerapen<sup>3</sup>, Mohit Vijayakumar<sup>3</sup>, Sophie Welch<sup>3</sup>, Hannah White<sup>5</sup>, Theresa Wodehouse<sup>3</sup>, Lucinda Wynne<sup>3</sup>, and Dan Zahedi<sup>19</sup>

<sup>1</sup>Department of Immunology and Inflammation, Imperial College London, London, UK

<sup>2</sup>Department of Infectious Disease, Imperial College London, London, UK

<sup>3</sup>St Bartholomew's Hospital, Barts Health NHS Trust, London, UK

<sup>4</sup>Institute of Cardiovascular Science, University College London, UK

<sup>5</sup>UK Health Security Agency, Porton Down, UK

<sup>6</sup>Blizard Institute, Barts and the London School of Medicine and Dentistry, Queen Mary University of London, London, UK

<sup>7</sup>Division of Infection and Immunity, University College London, London, UK

<sup>8</sup>Lung Division, Royal Brompton and Harefield Hospitals, Guy's and St Thomas' NHS Foundation Trust, London, UK

<sup>9</sup>Division of Medicine, University College London, London, UK

<sup>10</sup>German Heart Centre and Charité University, Berlin, Germany

<sup>11</sup>Royal Free London NHS Foundation Trust, London, UK

<sup>14</sup>Viral Pseudotype Unit, Medway School of Pharmacy, Chatham Maritime, Kent, UK

<sup>15</sup>Centre for Clinical Pharmacology, University College London, London, UK

<sup>16</sup>Translational Mass Spectrometry Research Group, Genetics & Genomic Medicine, UCL Institute of Child Health, London, UK

<sup>17</sup>Great Ormond Street Biomedical Research Centre, UCL Institute of Child Health, London, UK

<sup>18</sup>East London NHS Foundation Trust Unit for Social and Community Psychiatry, Newham Centre for Mental Health, London, UK

<sup>19</sup>School of Clinical Medicine, University of Cambridge, Cambridge, UK

<sup>20</sup>William Harvey Research Institute, Queen Mary University of London, London, UK

<sup>21</sup>James Wigg Practice, Kentish Town, London, UK

<sup>22</sup>Academic Rheumatology, Clinical Sciences, Nottingham City Hospital, Nottingham, UK

<sup>23</sup>NIHR Nottingham Biomedical Research Centre, Nottingham University Hospitals NHS Trust and University of Nottingham, Nottingham, UK

[Professor James C Moon is the UK COVIDsortium Investigators representative:

email: james.moon1@nhs.net]
